# Supplementary material for: Daily decrease of post-operative alpha-fetoprotein by 9% discriminates prognosis of HCC: A multicenter retrospective study
Source: PubMed Central journal article supplement (PMC6932889; doi:10.18632/aging.102513), 2019-12-12
Supplement: aging-11-102513-s002..pdf [file aging-11-102513-s002..pdf]

## SUPPLEMENTARY TABLES

**Supplementary Table 1. Demographic of TNM, BCLC, ALBI, Child-Pugh system in the training cohort.**

| Characteristic | Variable          | A09≤9%(n=61) | A09>9%(n=649)    |
|----------------|-------------------|--------------|------------------|
| TNM            | IA/IB/II/IIIA/IVA | 14/20/18/5/4 | 114/259/212/61/3 |
| BCLC           | A/B/C/            | 35/7/19      | 352/94/203       |
| ALBI           | 1/2/3             | 0/24/37      | 0/290/344        |
| Child-Pugh     | A/B/C             | 60/1/0       | 638/11/0         |

**Supplementary Table 2. Cox regression analyses (RFS/OS) based on TNM, BCLC, ALBI Child-Pugh system.**

| Characteristic | Variable | Overall survival          |                      | Recurrence-free survival  |                      |
|----------------|----------|---------------------------|----------------------|---------------------------|----------------------|
|                |          | Univariate Cox regression |                      | Univariate Cox regression |                      |
|                |          | HR(95% CI)                | P value <sup>a</sup> | HR(95% CI)                | P value <sup>a</sup> |
| TNM            | IA       | reference                 | 0.000                | reference                 | 0.000                |
|                | IB       | 2.39(0.996-5.749)         |                      | 1.81(1.092-3.006)         |                      |
|                | II       | 3.01(1.254-7.208)         |                      | 2.60(1.574-4.287)         |                      |
|                | IIIA     | 9.59(3.887-23.680)        |                      | 6.01(3.479-10.390)        |                      |
|                | IVA      | 18.94(4.710-76.153)       |                      | 9.67(3.601-25.981)        |                      |
| BCLC           | A        | reference                 | 0.003                | reference                 | 0.000                |
|                | B        | 2.06(1.137-3.717)         |                      | 2.14(1.462-3.122)         |                      |
|                | C        | 2.12(1.350-3.331)         |                      | 2.01(1.494-2.703)         |                      |
| ALBI           | 2/3      | 1.71(1.102-2.638)         | 0.016                | 1.27(0.963-1.674)         | 0.091                |
| Child-Pugh     | A/B      | 4.09(1.655-10.082)        | 0.002                | 2.17(1.021-4.612)         | 0.044                |

Please browse Full Text version to see the data of Supplementary Table 3

**Supplementary Table 3. Identification of independent risk factors based on COX and logistic regression analysis.**
